# Supplementary material for: Biosynthesis of Vitamins and Cofactors in Bacterium-Harbouring Trypanosomatids Depends on the Symbiotic Association as Revealed by Genomic Analyses
Source: PLoS One. 2013 Nov 19;8(11):e79786. doi: 10.1371/journal.pone.0079786 (PMC3833962; doi:10.1371/journal.pone.0079786)
Supplement: Table S2 — Trypanosomatidae genes characterized in this study. (XLS) [file pone.0079786.s008.xls]

## Sheet: Feuil1
	Accession numbers
EC number	Angomonas deanei	Angomonas desouzai	Strigomonas culicis	Strigomonas oncopelti	Strigomonas galati	Crithidia acanthocephali	Herpetomonas muscarum
1.1.1.100	KF160081	KF160098	KF160036	KF160137	KF160252	KF160178	KF160225
1.1.1.169	KF160064	KF160119, KF160120, KF160121	KF160045	KF160154	KF160291		KF160217
1.5.1.3	KF160067	KF160109	KF160029	KF160142	KF160283	KF160198	KF160213
1.5.1.34	KF160060	KF160118	KF160033	KF160143	KF160243	KF160176	KF160215
2.1.1.201	KF160070	KF160094	KF160053	KF160147	KF160248	KF160180	KF160207
2.3.1.41	KF160084	KF160107	KF160031	KF160161	KF160286	KF160182	KF160235
2.4.2.11	KF160090	KF160110	KF160044	KF160140	KF160277	KF160181	KF160232
2.6.1.5	KF160061, KF160062	KF160101	KF160018, KF160019, KF160020	KF160149, KF160150, KF160151	KF160271, KF160272, KF160273, KF160274, KF160290	KF160193, KF160194, KF160195, KF160196	KF160239
2.7.1.23	KF160066	KF160125	KF160025	KF160163	KF160292	KF160205	KF160240
2.7.1.24	KF160086	KF160093	KF160028	KF160157	KF160246	KF160202	KF160222
2.7.1.26	KF160059	KF160096	KF160032	KF160155	KF160275	KF160179	KF160242
2.7.1.33	KF160085	KF160122	KF160039	KF160129	KF160276	KF160191	KF160219
2.7.1.35	KF160091	KF160113	KF160030	KF160165	KF160287	KF160192	KF160228
2.7.7.1	KF160080	KF160092	KF160037	KF160139	KF160267	KF160186	KF160229
2.7.7.2	KF160073	KF160097	KF160048	KF160146	KF160249	KF160168	KF160216
2.7.7.3	KF160063	KF160095	KF160027	KF160148	KF160279	KF160189	KF160220
2.8.1.7	KF160079	KF160102	KF160021	KF160144	KF160253	KF160175	KF160227
3.1.3.1	KF160074	KF160108	KF160052	KF160138	KF160278	KF160177	KF160234
3.2.2.1	KF160083	KF160099	KF160055	KF160141	KF160269	KF160170	KF160214
3.5.1.19						KF160171	KF160241
3.6.1.22	KF160076	KF160106	KF160043	KF160158	KF160288	KF160169	KF160230, KF160231
3.7.1.3	KF160068	KF160126	KF160051	KF160164	KF160293	KF160167	KF160237
4.1.1.36	KF160082	KF160117	KF160035	KF160159	KF160244	KF160187	KF160218
4.1.3.40			KF160050	KF160156	KF160289
6.2.1.12	KF160077, KF160078	KF160112	KF160046, KF160047	KF160134, KF160135, KF160136	KF160254, KF160255, KF160256, KF160257, KF160258, KF160259, KF160260, KF160261,KF160262, KF160263, KF160264, KF160265, KF160266	KF160190	KF160223, KF160224
6.3.2.17	KF160071	KF160111	KF160026	KF160128	KF160245	KF160184	KF160238
6.3.2.5	KF160075	KF160100	KF160022	KF160153	KF160284	KF160166	KF160226
6.3.4.15	KF160069		KF160034	KF160160	KF160268	KF160172, KF160173, KF160174	KF160233
6.3.5.1	KF160065	KF160103	KF160049	KF160152	KF160285	KF160188	KF160206
Coq7	KF160089	KF160104	KF160054	KF160162	KF160270	KF160185	KF160212
UbiACoq2	KF160087	KF160123	KF160038	KF160127	KF160250	KF160204	KF160211
UbiB	KF160056, KF160057, KF160058	KF160114, KF160115, KF160116	KF160040, KF160041, KF160042	KF160130, KF160131, KF160132	KF160280, KF160281, KF160282	KF160199, KF160200, KF160201	KF160208, KF160209, KF160210
UbiG	KF160088	KF160105	KF160024	KF160133	KF160247	KF160197	KF160236
UbiH	KF160072	KF160124	KF160023	KF160145	KF160251	KF160183	KF160221
